# Supplementary material
Source: PubMed Central journal article supplement (PMC8832919)
Supplement: tpmd210550.SD1.pdf [file tpmd210550.SD1.pdf]

# Ruminant-related risk factors are associated with Shiga toxin-producing *Escherichia coli* infection in children in southern Ghana

Lambrecht et al.

Online Supplementary Data

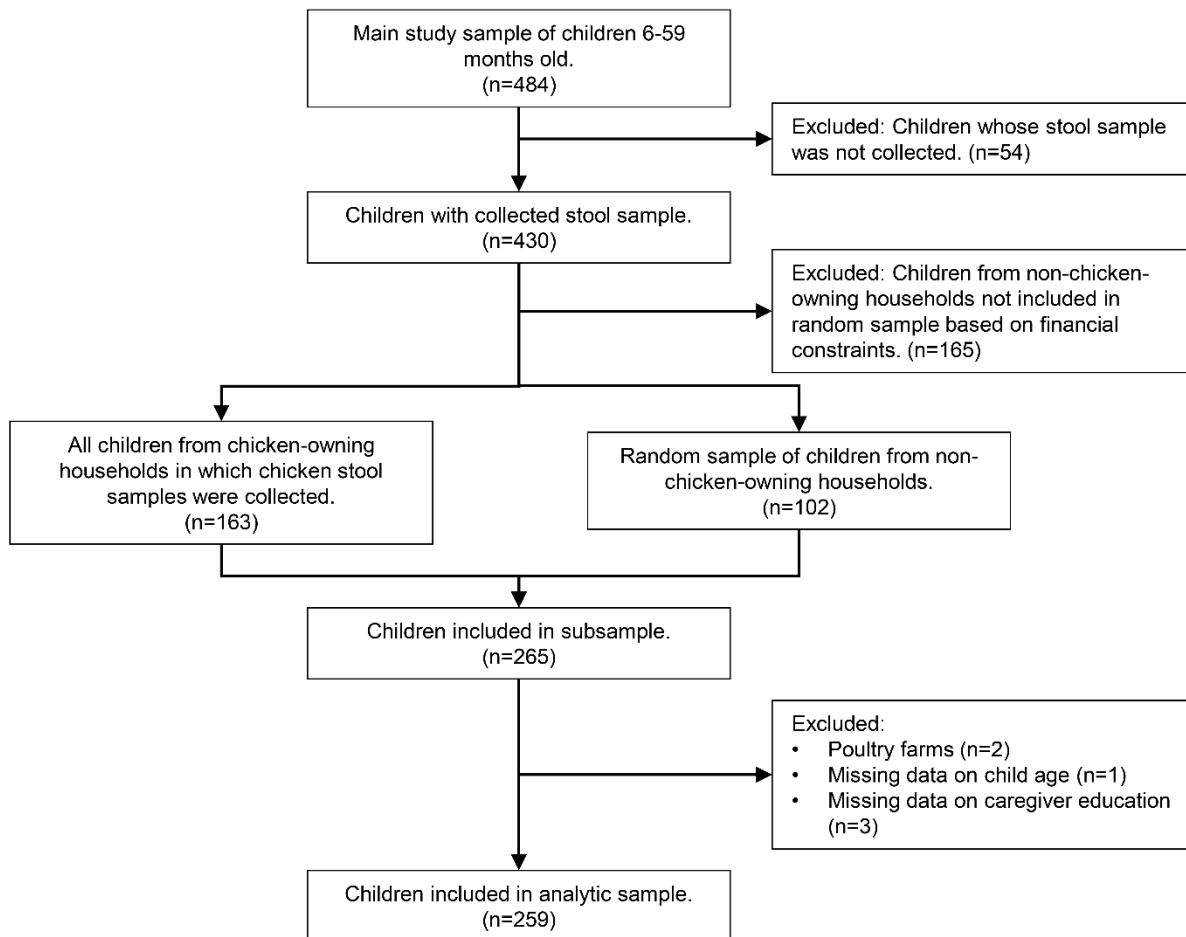

Supplemental Figure 1. Flow chart describing sample selection.

**Ruminant-related risk factors are associated with Shiga toxin-producing *Escherichia coli* infection in children in southern Ghana**

Lambrecht et al.

Online Supplementary Data

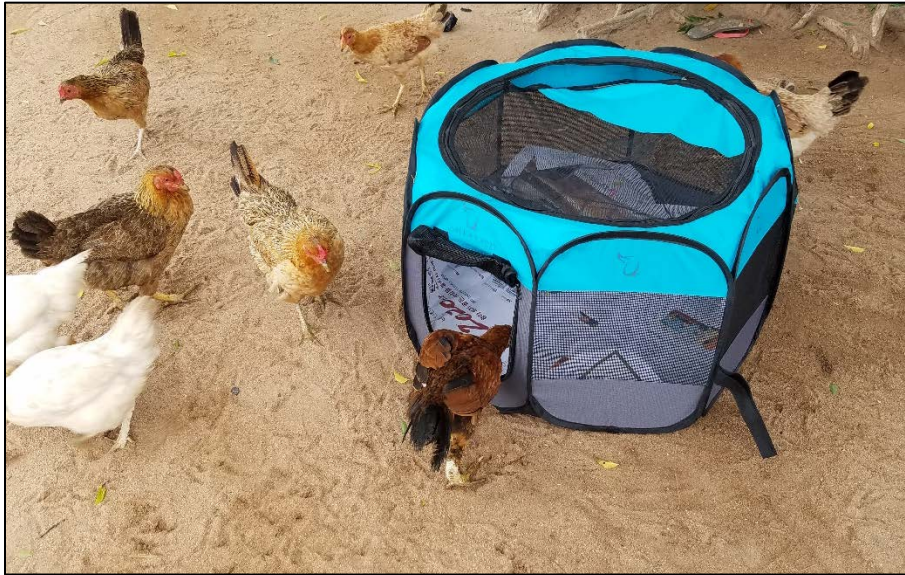

**Supplemental Figure 2. Chicken from a household's flock entering a stool sample collection pen.**

## Ruminant-related risk factors are associated with Shiga toxin-producing *Escherichia coli* infection in children in southern Ghana

Lambrecht et al.

Online Supplementary Data

**Supplemental Table 1.** Primer and probe sequences for qPCR detection of pathogen gene targets and assay performance characteristics<sup>1</sup>

| Pathogen                   | Target Gene | Primer and probe sequences <sup>2</sup><br>(F: Forward primer, R: Reverse primer, P: Probe)         | Ref                            | PCR efficiency, %<br>(95% CI) | PCR R <sup>2</sup> |
|----------------------------|-------------|-----------------------------------------------------------------------------------------------------|--------------------------------|-------------------------------|--------------------|
| <i>C. jejuni/C. coli</i>   | <i>cadF</i> | F: CTGCTAAACCATAGAAATAAAATTTCTCAC<br>R: CTTTGAAGGTAATTTAGATATGGATAATCG<br>P: CATTTTGACGATTTTGGCTTGA | (1)                            | 88.8 (88.1, 89.5)             | 1.000              |
| EPEC                       | <i>eae</i>  | F: CATTGATCAGGATTTTTCTGGTGATA<br>R: CTCATGCGGAAATAGCCGTTA<br>P: CGAATACTGGCGAGACTATTTCAA            | Modified from (1) <sup>3</sup> | 87.3 (77.3, 100.1)            | 0.982              |
| EPEC                       | <i>bfpA</i> | F: TGGTGCTTGCGCTTGCT<br>R: CGTTGCGCTCATTACTTCTG<br>P: CAGTCTGCGTCTGATTCCAA                          | (1)                            | 107.9 (102.2, 114.3)          | 0.997              |
| STEC                       | <i>stx1</i> | F: ACTTCTCGACTGCAAAGACGTATG<br>R: ACAAATTATCCCCTGWGCCACTATC<br>P: CTCTGCAATAGGTACTION               | (1)                            | 105.2 (96.7, 115.2)           | 0.990              |
| STEC                       | <i>stx2</i> | F: CCACATCGGTGTCTGTTATTAACC<br>R: GGTCAAAACGCGCCTGATAG<br>P: TTGCTGTGGATATACGAGG                    | (1)                            | 112.8 (110.6, 115.0)          | 1.000              |
| <i>Salmonella enterica</i> | <i>ttr</i>  | F: CTCACCAGGAGATTACAACATGG<br>R: AGCTCAGACCAAAGTGACCATC<br>P: CACCGACGGCGAGACCGACTTT                | (1)                            | N/A <sup>4</sup>              | N/A                |

<sup>1</sup>PCR efficiency and R<sup>2</sup> of the dilution series curve was determined using pooled known positives from child stool samples in four-fold dilutions with four replicates at each dilution. Abbreviations: *C. jejuni/coli*, *Campylobacter jejuni* or *Campylobacter coli*; EPEC, enteropathogenic *Escherichia coli*; STEC, Shiga toxin-producing *Escherichia coli*; CI, Confidence Interval; qPCR, quantitative Polymerase Chain Reaction

<sup>2</sup>All probes were double-quencher probes with a 5' 6-FAM<sup>TM</sup> fluorophore, internal ZEN<sup>TM</sup> quencher, and 3' Iowa Black<sup>®</sup> Fluorescent Quencher.

<sup>3</sup>Base pairs CGA were added to the 5' end of the probe sequence to increase melting temperature.

<sup>4</sup>An insufficient number of positive samples precluded running a PCR efficiency curve.

### References

1. Liu J, Gratz J, Amour C, Nshama R, Walongo T, Maro A, Mduma E, Platts-Mills J, Boisen N, Nataro J, et al. Optimization of quantitative PCR Methods for enteropathogen detection. PLoS One. 2016;11:e0158199. DOI: 10.1371/journal.pone.0158199

## Ruminant-related risk factors are associated with Shiga toxin-producing *Escherichia coli* infection in children in southern Ghana

Lambrecht et al.

Online Supplementary Data

**Supplemental Table 2. Livestock management and household hygiene characteristics among livestock-owning and non-livestock-owning households in Greater Accra, Ghana<sup>1</sup>**

| Indicator                                                      | N   | Overall     | Livestock-owning households | Non-livestock-owning households |
|----------------------------------------------------------------|-----|-------------|-----------------------------|---------------------------------|
| <i>Livestock management<sup>2</sup></i>                        |     |             |                             |                                 |
| Livestock free-roam in the yard during the day                 |     |             |                             |                                 |
| Chickens                                                       | 157 | N/A         | 141 (89.8%)                 | N/A                             |
| Goats                                                          | 39  | N/A         | 27 (69.2%)                  | N/A                             |
| Sheep                                                          | 15  | N/A         | 10 (66.7%)                  | N/A                             |
| Cattle                                                         | 13  | N/A         | 1 (7.7%)                    | N/A                             |
| Livestock are confined in a pen/corral/coop at night           |     |             |                             |                                 |
| Chickens                                                       | 157 | N/A         | 107 (68.2%)                 | N/A                             |
| Goats                                                          | 39  | N/A         | 21 (53.9%)                  | N/A                             |
| Sheep                                                          | 15  | N/A         | 10 (66.7%)                  | N/A                             |
| Cattle                                                         | 13  | N/A         | 12 (92.3%)                  | N/A                             |
| <i>Livestock observations during the interview<sup>3</sup></i> |     |             |                             |                                 |
| Livestock observed entering the household living quarters      | 253 | 127 (50.2%) | 92 (59.0%)                  | 35 (36.1%)***                   |
| Chickens observed roaming in the yard                          | 254 | 227 (89.4%) | 153 (97.5%)                 | 74 (76.3%)***                   |
| Animal feces observed in the yard                              | 256 | 214 (83.6%) | 148 (93.7%)                 | 66 (67.4%)***                   |
| <i>Household hygiene characteristics and behaviors</i>         |     |             |                             |                                 |
| Human feces observed in yard <sup>3</sup>                      | 256 | 13 (5.1%)   | 10 (6.3%)                   | 3 (3.1%)                        |
| Rubbish observed in yard <sup>3</sup>                          | 257 | 112 (43.6%) | 78 (49.1%)                  | 34 (34.7%)*                     |
| Gray (waste) water observed in yard <sup>3</sup>               | 255 | 30 (11.8%)  | 18 (11.4%)                  | 12 (12.4%)                      |
| Primary caregiver wearing shoes <sup>3</sup>                   | 253 | 185 (73.1%) | 109 (70.3%)                 | 76 (77.6%)                      |
| Child wearing shoes <sup>3</sup>                               | 213 | 86 (40.4%)  | 52 (40.9%)                  | 34 (39.5%)                      |
| Household cooking location <sup>2</sup>                        |     |             |                             |                                 |
| Inside the house or a separate building                        |     | 112 (43.2%) | 67 (42.1%)                  | 45 (45.0%)                      |
| Outdoors                                                       |     | 147 (56.8%) | 92 (57.9%)                  | 55 (55.0%)                      |
| Where index child spends time during the day <sup>2</sup>      |     |             |                             |                                 |
| Inside household dwelling                                      | 259 | 22 (8.5%)   | 10 (6.3%)                   | 12 (12.0%)                      |
| In the yard                                                    |     | 127 (49.0%) | 80 (50.3%)                  | 47 (47.0%)                      |
| At daycare, nursery, or school                                 |     | 65 (25.1%)  | 42 (26.4%)                  | 23 (23.0%)                      |
| Other location <sup>4</sup>                                    |     | 45 (17.4%)  | 27 (17.0%)                  | 18 (18.0%)                      |

<sup>1</sup>Values are n (%). Chi-squared test used to compare proportions between livestock-owning and non-livestock-owning households. \*p<0.05, \*\*p<0.01, \*\*\*p<0.001

<sup>2</sup>Answers based on caregiver-reported responses to questions during the interview.

<sup>3</sup>Answers based on enumerator observations after the interview.

<sup>4</sup>Other locations include: At another household (close to the index household), At another household (away from the index household, in the same community), With the mother/other household member (around in the community), With the mother/other household member (outside the community), In the field (farming) (with mother/household member)

# Ruminant-related risk factors are associated with Shiga toxin-producing *Escherichia coli* infection in children in southern Ghana

Lambrecht et al.

Online Supplementary Data

**Supplemental Table 3. Full adjusted logistic regression models predicting odds of enteropathogen detection in children 6-59 months old by livestock-associated risk factors<sup>1</sup>**

|                                                                       | Cattle ownership<br>(n=259) | Goat or sheep ownership<br>(n=259) | Poultry ownership, with other livestock<br>(n=259) | Poultry ownership only<br>(n=259) | Pathogen detected in chicken stool<br>(n=156) | Animal feces observed around household<br>(n=256) | Fresh cow's milk consumed ≥1 time/week<br>(n=259) | Chicken meat consumed ≥1 time/week<br>(n=259) |
|-----------------------------------------------------------------------|-----------------------------|------------------------------------|----------------------------------------------------|-----------------------------------|-----------------------------------------------|---------------------------------------------------|---------------------------------------------------|-----------------------------------------------|
| <i>Models predicting odds of C. jejuni/coli detection<sup>2</sup></i> |                             |                                    |                                                    |                                   |                                               |                                                   |                                                   |                                               |
| Livestock-associated risk factor                                      |                             | 1.59<br>(0.59, 4.29)               | 1.58<br>(0.67, 3.73)                               | 0.63<br>(0.31, 1.26)              | 0.73<br>(0.27, 1.96)                          | 0.51<br>(0.16, 1.65)                              | 1.10<br>(0.41, 2.94)                              | 1.03<br>(0.40, 2.66)                          |
| Child sex (ref: male)                                                 |                             | 1.04<br>(0.53, 2.04)               | 1.05<br>(0.53, 2.06)                               | 0.99<br>(0.49, 2.02)              | 1.13<br>(0.54, 2.38)                          | 1.01<br>(0.49, 2.06)                              | 1.03<br>(0.51, 2.05)                              | 1.02<br>(0.52, 2.01)                          |
| Child age (months)                                                    |                             | 0.95*<br>(0.91, 0.99)              | 0.95<br>(0.91, 1.00)                               | 0.96*<br>(0.92, 1.00)             | 0.93<br>(0.87, 1.00)                          | 0.96<br>(0.92, 1.00)                              | 0.95<br>(0.91, 1.00)                              | 0.95<br>(0.91, 1.00)                          |
| Household practices open defecation (ref: no)                         |                             | 0.90<br>(0.25, 3.27)               | 0.89<br>(0.24, 3.23)                               | 1.00<br>(0.26, 3.82)              | 0.53<br>(0.10, 2.77)                          | 0.99<br>(0.27, 3.68)                              | 0.95<br>(0.25, 3.59)                              | 0.96<br>(0.27, 3.35)                          |
| Caregiver primary or no education (ref: junior or higher)             |                             | 0.90<br>(0.39, 2.07)               | 0.90<br>(0.39, 2.08)                               | 0.87<br>(0.37, 2.03)              | 1.02<br>(0.28, 3.74)                          | 0.87<br>(0.40, 1.90)                              | 0.90<br>(0.39, 2.07)                              | 0.90<br>(0.38, 2.16)                          |
| District (ref: Ga East)                                               |                             | 1.82<br>(0.65, 5.07)               | 1.80<br>(0.64, 5.02)                               | 1.85<br>(0.66, 5.19)              | 1.93<br>(0.50, 7.44)                          | 2.03<br>(0.67, 6.16)                              | 1.79<br>(0.63, 5.05)                              | 1.80<br>(0.63, 5.13)                          |
| <i>Models predicting odds of aEPEC detection</i>                      |                             |                                    |                                                    |                                   |                                               |                                                   |                                                   |                                               |
| Livestock-associated risk factor                                      | 0.63<br>(0.23, 1.72)        | 0.89<br>(0.45, 1.76)               | 1.00<br>(0.54, 1.84)                               | 1.37<br>(0.81, 2.32)              | 1.36<br>(0.76, 2.41)                          | 0.71<br>(0.34, 1.50)                              | 0.55<br>(0.17, 1.80)                              | 1.17<br>(0.67, 2.05)                          |
| Child sex (ref: male)                                                 | 0.92<br>(0.59, 1.42)        | 0.91<br>(0.59, 1.41)               | 0.92<br>(0.59, 1.42)                               | 0.93<br>(0.60, 1.46)              | 0.87<br>(0.40, 1.88)                          | 0.88<br>(0.55, 1.41)                              | 0.90<br>(0.59, 1.38)                              | 0.89<br>(0.57, 1.40)                          |
| Child age (months)                                                    | 1.01<br>(0.99, 1.02)        | 1.01<br>(.99, 1.03)                | 1.01<br>(0.99, 1.02)                               | 1.01<br>(0.99, 1.03)              | 1.00<br>(0.98, 1.03)                          | 1.01<br>(0.99, 1.03)                              | 1.01<br>(0.99, 1.03)                              | 1.00<br>(0.98, 1.03)                          |
| Household uses unimproved drinking water source (ref: no)             | 0.20***<br>(0.11, 0.38)     | 0.20***<br>(0.10, 0.40)            | 0.20***<br>(0.10, 0.37)                            | 0.20***<br>(0.11, 0.39)           | 0.35*<br>(0.15, 0.80)                         | 0.20***<br>(0.11, 0.37)                           | 0.22***<br>(0.11, 0.44)                           | 0.19***<br>(0.10, 0.37)                       |
| Household practices open defecation (ref: no)                         | 1.99*<br>(1.16, 3.41)       | 1.98*<br>(1.16, 3.38)              | 1.96*<br>(1.14, 3.37)                              | 1.93*<br>(1.13, 3.30)             | 1.77*<br>(1.01, 3.10)                         | 1.94*<br>(1.13, 3.34)                             | 2.12**<br>(1.33, 3.36)                            | 2.01*<br>(1.15, 3.51)                         |
| Caregiver primary or no education (ref: junior or higher)             | 0.90<br>(0.61, 1.32)        | 0.90<br>(0.61, 1.32)               | 0.90<br>(0.61, 1.31)                               | 0.91<br>(0.62, 1.34)              | 0.83<br>(0.45, 1.52)                          | 0.90<br>(0.59, 1.38)                              | 0.91<br>(0.63, 1.32)                              | 0.91<br>(0.61, 1.35)                          |
| District (ref: Ga East)                                               | 0.43**<br>(0.23, 0.81)      | 0.42**<br>(0.22, 0.78)             | 0.42**<br>(0.23, 0.78)                             | 0.41**<br>(0.22, 0.76)            | 0.41*<br>(0.18, 0.89)                         | 0.46**<br>(0.26, 0.82)                            | 0.44*<br>(0.23, 0.83)                             | 0.42**<br>(0.61, 1.35)                        |
| Cattle ownership (ref: no)                                            |                             |                                    |                                                    |                                   |                                               |                                                   | 0.70<br>(0.21, 2.37)                              |                                               |
| Goat or sheep ownership (ref: no)                                     |                             |                                    |                                                    |                                   |                                               |                                                   | 0.97<br>(0.47, 1.98)                              |                                               |
| <i>Models predicting odds of STEC detection<sup>3</sup></i>           |                             |                                    |                                                    |                                   |                                               |                                                   |                                                   |                                               |
| Livestock-associated risk factor                                      | 4.32<br>(0.74, 25.10)       | 4.30*<br>(1.32, 14.08)             | 6.31*<br>(1.27, 31.22)                             | 0.57<br>(0.09, 3.38)              | 7.85***<br>(2.54, 24.30)                      |                                                   | 3.03***<br>(1.75, 5.24)                           | 1.60<br>(0.84, 3.03)                          |
| Child sex (ref: male)                                                 | 1.04<br>(0.33, 3.28)        | 1.22<br>(0.47, 3.19)               | 1.28<br>(0.50, 3.32)                               | 1.10<br>(0.40, 3.07)              | 1.28<br>(0.39, 4.14)                          |                                                   | 1.28<br>(0.44, 3.69)                              | 1.11<br>(0.42, 2.95)                          |

## Ruminant-related risk factors are associated with Shiga toxin-producing *Escherichia coli* infection in children in southern Ghana

Lambrecht et al.

### Online Supplementary Data

|                                                           |                         |                         |                          |                         |                           |                         |                          |
|-----------------------------------------------------------|-------------------------|-------------------------|--------------------------|-------------------------|---------------------------|-------------------------|--------------------------|
| Child age (months)                                        | 1.04<br>(0.99, 1.09)    | 1.03<br>(0.98, 1.08)    | 1.03<br>(0.98, 1.08)     | 1.03<br>(0.98, 1.08)    | 1.06*<br>(1.00, 1.12)     | 1.03<br>(0.97, 1.09)    | 1.03<br>(0.97, 1.08)     |
| Household uses unimproved drinking water source (ref: no) | 5.09**<br>(1.87, 13.89) | 5.20**<br>(1.87, 14.44) | 6.98***<br>(2.68, 18.22) | 5.77**<br>(1.90, 17.49) | 15.82***<br>(6.58, 38.05) | 4.30**<br>(1.50, 12.34) | 5.78**<br>(1.80, 18.56)  |
| Household practices open defecation (ref: no)             | 3.99**<br>(1.77, 9.00)  | 4.19**<br>(1.54, 11.38) | 3.85**<br>(1.47, 10.07)  | 4.66**<br>(1.71, 12.72) | 6.90**<br>(2.25, 21.15)   | 3.10*<br>(1.31, 7.32)   | 5.01***<br>(2.14, 11.76) |
| Caregiver primary or no education (ref: junior or higher) | 2.20<br>(0.81, 5.99)    | 2.35<br>(0.93, 5.97)    | 2.26<br>(0.83, 6.16)     | 2.06<br>(0.66, 6.42)    | 3.46<br>(0.66, 18.12)     | 2.18<br>(0.84, 5.64)    | 2.20<br>(0.61, 7.92)     |
| Cattle ownership (ref: no)                                |                         |                         |                          |                         |                           | 1.34<br>(0.15, 11.62)   |                          |
| Goat or sheep ownership (ref: no)                         |                         |                         |                          |                         |                           | 3.71*<br>(1.26, 10.89)  |                          |

<sup>1</sup>Values are adjusted odds ratios (OR) and 95% confidence intervals (CI) using logistic regression models controlling for listed covariates. \* $p < 0.05$ , \*\* $p < 0.01$ , \*\*\* $p < 0.001$ . aEPEC, atypical enteropathogenic *Escherichia coli*; *C. jejuni/coli*, *Campylobacter jejuni* or *Campylobacter coli*; STEC, Shiga toxin-producing *E. coli*

<sup>2</sup>Cattle ownership logistic model did not run due to perfect prediction of no *C. jejuni/coli* detection. Improved drinking water source not included as a covariate in the models because of perfect prediction of no *C. jejuni/coli* detection.

<sup>3</sup>Observation of animal feces around household logistic model did not run due to perfect prediction of STEC detection. District was not included as a covariate in the models because of perfect prediction of STEC detection in the Shai Osudoku district.
